# Supplementary material for: Antigen stimulation of peripheral blood mononuclear cells from Mycobacterium bovis infected cattle yields evidence for a novel gene expression program
Source: PubMed Central journal article supplement (PMC2569068; doi:10.1186/1471-2164-9-447), 2008-09-29
Supplement: 1471-2164-9-447-S1.pdf [file 1471-2164-9-447-S1.pdf]

**Paper Title:** Antigen stimulation of peripheral blood mononuclear cells from *Mycobacterium bovis* infected cattle yields evidence for a novel gene expression program. Meade, K.G. *et al.*

**Table S1:** Green shaded rows detail 250 BOTL-5 microarray spot features that showed significant differential expression for the BTB-infected animal group ( $n = 6$ ) between  $T_3$  and  $T_0$  (3h versus 0h) post stimulation with bovine tuberculin. Yellow shaded rows detail 80 BOTL-5 microarray spot features that showed significant differential expression for the BTB-infected animal group ( $n = 6$ ) between  $T_{12}$  and  $T_3$  (12h versus 3h) post stimulation with bovine tuberculin. [NB. Spot features are ranked by fold-change for each time point comparison].

| Rank | BOTL-5 coordinates | Feature description                                               | Gene symbol      | P-value   | Fold-change | Time point comparison |
|------|--------------------|-------------------------------------------------------------------|------------------|-----------|-------------|-----------------------|
| 1    | A8.c6              | MHC class I heavy chain isoform 1                                 | <i>BOLA</i>      | 0.0004015 | 5.58        | 3h vs 0h              |
| 2    | A8.g9              | MHC class I heavy chain isoform 1                                 | <i>BOLA</i>      | 0.0007032 | 5.28        | 3h vs 0h              |
| 3    | C8.g9              | similar to chemokine CCL1/I-309   similar to chemokine CCL1/I-309 |                  | 0.0008610 | 5.28        | 3h vs 0h              |
| 4    | C8.c6              | similar to chemokine CCL1/I-309   similar to chemokine CCL1/I-309 |                  | 0.0011065 | 4.98        | 3h vs 0h              |
| 5    | C11.g5             | hypothetical protein                                              | <i>LOC512361</i> | 0.0012870 | 3.94        | 3h vs 0h              |
| 6    | C6.c6              | similar to GMCSFR receptor                                        | <i>LOC511847</i> | 0.0052822 | 3.86        | 3h vs 0h              |
| 7    | D11.i3             | Similar to serine/threonine protein kinase                        | <i>LOC514210</i> | 0.0010479 | 3.82        | 3h vs 0h              |
| 8    | D11.e1             | Similar to serine/threonine protein kinase                        | <i>LOC514210</i> | 0.0005247 | 3.78        | 3h vs 0h              |
| 9    | C11.c2             | hypothetical protein                                              | <i>LOC512361</i> | 0.0028230 | 3.73        | 3h vs 0h              |
| 10   | C6.g9              | similar to GMCSFR receptor                                        | <i>LOC511847</i> | 0.0062652 | 3.65        | 3h vs 0h              |
| 11   | B2.b5              | translocating chain-associating membrane protein                  | <i>TRAM</i>      | 0.0029163 | 3.08        | 3h vs 0h              |
| 12   | B2.f8              | translocating chain-associating membrane protein                  | <i>TRAM</i>      | 0.0041705 | 3.03        | 3h vs 0h              |
| 13   | C1.c4              | similar to MAP kinase kinase 7 gamma 1                            | <i>LOC787278</i> | 0.0023537 | 3.01        | 3h vs 0h              |

| Rank | BOTL-5 coordinates | Feature description                                                                                        | Gene symbol   | P-value   | Fold-change | Time point comparison |
|------|--------------------|------------------------------------------------------------------------------------------------------------|---------------|-----------|-------------|-----------------------|
| 14   | B1.i7              | GATA binding protein 4 (GATA4)                                                                             |               | 0.0073891 | 2.77        | 3h vs 0h              |
| 15   | D11.i4             | Transcribed locus, weakly similar to XP_001083311.1 similar to kinase suppressor of ras 2 [Macaca mulatta] |               | 0.0002696 | 2.75        | 3h vs 0h              |
| 16   | A3.c6              | CD14 molecule                                                                                              | <i>CD14</i>   | 0.0365308 | 2.63        | 3h vs 0h              |
| 17   | B3.e3              | splicing factor, arginine/serine-rich 2                                                                    | <i>SFRS2</i>  | 0.0011942 | 2.56        | 3h vs 0h              |
| 18   | B3.i5              | splicing factor, arginine/serine-rich 2                                                                    | <i>SFRS2</i>  | 0.0052018 | 2.47        | 3h vs 0h              |
| 19   | B1.e6              | GATA binding protein 4 (GATA4)                                                                             |               | 0.0117014 | 2.47        | 3h vs 0h              |
| 20   | B9.e1              | v-akt murine thymoma viral oncogene homolog 1                                                              | <i>AKT1</i>   | 0.0065464 | 2.46        | 3h vs 0h              |
| 21   | B3.i8              | ephrin-A2                                                                                                  | <i>ENFNA2</i> | 0.0405087 | 2.46        | 3h vs 0h              |
| 22   | D1.e4              | GATA-binding protein 4 (GATA4)                                                                             |               | 0.0046093 | 2.42        | 3h vs 0h              |
| 23   | D9.i4              | Sin3A-associated protein, 18kDa                                                                            | <i>SAP18</i>  | 0.0453981 | 2.39        | 3h vs 0h              |
| 24   | D1.d9              | DNA fragmentation factor, 45kDa, alpha polypeptide                                                         | <i>DFFA</i>   | 0.0189222 | 2.37        | 3h vs 0h              |
| 25   | B6.e1              | eukaryotic translation elongation factor 1 gamma                                                           | <i>EEF1G</i>  | 0.0003536 | 2.36        | 3h vs 0h              |
| 26   | D5.e8              | nuclear factor of kappa light polypeptide gene enhancer in B-cells 1 (p105)                                | <i>NFKB1</i>  | 0.0117779 | 2.34        | 3h vs 0h              |
| 27   | A3.g9              | CD14 molecule                                                                                              | <i>CD14</i>   | 0.0300464 | 2.33        | 3h vs 0h              |
| 28   | D1.i6              | GATA-binding protein 4 (GATA4)                                                                             |               | 0.0024533 | 2.30        | 3h vs 0h              |
| 29   | B9.i3              | v-akt murine thymoma viral oncogene homolog 1                                                              | <i>AKT1</i>   | 0.0082823 | 2.30        | 3h vs 0h              |
| 30   | D5.a3              | nuclear factor of kappa light polypeptide gene enhancer in B-cells 1 (p105)                                | <i>NFKB1</i>  | 0.0092788 | 2.30        | 3h vs 0h              |
| 31   | B6.i4              | eukaryotic translation elongation factor 2                                                                 | <i>EEF2</i>   | 0.0000402 | 2.29        | 3h vs 0h              |
| 32   | D2.i2              | similar to FGFR1 protein isoform 2                                                                         | <i>FGFR1</i>  | 0.0150168 | 2.27        | 3h vs 0h              |

| Rank | BOTL-5 coordinates | Feature description                                                                                        | Gene symbol      | P-value   | Fold-change | Time point comparison |
|------|--------------------|------------------------------------------------------------------------------------------------------------|------------------|-----------|-------------|-----------------------|
| 33   | D2.d9              | similar to FGFR1 protein isoform 2                                                                         | <i>FGFR1</i>     | 0.0152872 | 2.26        | 3h vs 0h              |
| 34   | B6.e2              | eukaryotic translation elongation factor 2                                                                 | <i>EEF2</i>      | 0.0000182 | 2.22        | 3h vs 0h              |
| 35   | D3.e6              | ephrin-A2 (EFNA2)                                                                                          |                  | 0.0077044 | 2.21        | 3h vs 0h              |
| 36   | C5.e8              | similar to Tropomyosin 3                                                                                   | <i>TPM3</i>      | 0.0013279 | 2.16        | 3h vs 0h              |
| 37   | D9.i6              | v-akt murine thymoma viral oncogene homolog 2                                                              | <i>AKT2</i>      | 0.0146746 | 2.16        | 3h vs 0h              |
| 38   | C1.g6              | similar to MAP kinase kinase 7 gamma 1                                                                     | <i>LOC787278</i> | 0.0101666 | 2.15        | 3h vs 0h              |
| 39   | D11.e2             | Transcribed locus, weakly similar to XP_001083311.1 similar to kinase suppressor of ras 2 [Macaca mulatta] |                  | 0.0221975 | 2.14        | 3h vs 0h              |
| 40   | B1.h9              | Rho guanine nucleotide exchange factor, mRNA (GEF 1)                                                       |                  | 0.0002962 | 2.13        | 3h vs 0h              |
| 41   | D1.e6              | similar to Serum response factor (SRF)                                                                     | <i>LOC533039</i> | 0.0008925 | 2.13        | 3h vs 0h              |
| 42   | B6.i3              | eukaryotic translation elongation factor 1 gamma                                                           | <i>EEF1G</i>     | 0.0010412 | 2.13        | 3h vs 0h              |
| 43   | D9.i8              | protein kinase, cAMP-dependent, regulatory, type I, beta                                                   | <i>PRKAR2B</i>   | 0.0077058 | 2.13        | 3h vs 0h              |
| 44   | D9.e7              | protein kinase, cAMP-dependent, regulatory, type I, beta                                                   | <i>PRKAR2B</i>   | 0.0046764 | 2.12        | 3h vs 0h              |
| 45   | A8.f5              | similar to Tyrosine-protein kinase Lyn                                                                     | <i>LOC534996</i> | 0.0092129 | 2.12        | 3h vs 0h              |
| 46   | C2.g4              | TAF6 RNA polymerase II, TATA box binding protein (TBP)-associated factor, 80kDa                            | <i>TAF6</i>      | 0.0467477 | 2.12        | 3h vs 0h              |
| 47   | D3.i7              | ephrin-A2 (EFNA2)                                                                                          |                  | 0.0148555 | 2.11        | 3h vs 0h              |
| 48   | C5.a3              | similar to Tropomyosin 3                                                                                   | <i>TPM3</i>      | 0.0016879 | 2.09        | 3h vs 0h              |
| 49   | D6.b8              | Transcribed locus                                                                                          |                  | 0.0043936 | 2.09        | 3h vs 0h              |
| 50   | D6.f1              | DAZ associated protein 2                                                                                   | <i>DAZAP2</i>    | 0.0123686 | 2.09        | 3h vs 0h              |
| 51   | D6.g2              | Transcribed locus                                                                                          |                  | 0.0187316 | 2.09        | 3h vs 0h              |

| Rank | BOTL-5 coordinates | Feature description                                                                            | Gene symbol      | P-value   | Fold-change | Time point comparison |
|------|--------------------|------------------------------------------------------------------------------------------------|------------------|-----------|-------------|-----------------------|
| 52   | B3.i2              | myelin basic protein (MBP)                                                                     |                  | 0.0269513 | 2.09        | 3h vs 0h              |
| 53   | A11.b8             | similar to death receptor 3                                                                    | <i>LOC783432</i> | 0.0153166 | 2.08        | 3h vs 0h              |
| 54   | D12.i8             | GAPDH                                                                                          | <i>GAPDH</i>     | 0.0232446 | 2.07        | 3h vs 0h              |
| 55   | B6.d9              | actin, beta                                                                                    | <i>ACTB</i>      | 0.0187244 | 2.06        | 3h vs 0h              |
| 56   | D12.h1             | GAPDH                                                                                          | <i>GAPDH</i>     | 0.0379525 | 2.06        | 3h vs 0h              |
| 57   | C6.h7              | nuclear factor of kappa light polypeptide gene enhancer in B-cells 1 (p105)                    | <i>NFKB1</i>     | 0.0380419 | 2.06        | 3h vs 0h              |
| 58   | A1.f3              | Similar to KIAA0668 protein                                                                    | <i>LOC618392</i> | 0.0000731 | 2.05        | 3h vs 0h              |
| 59   | B6.i2              | actin, beta                                                                                    | <i>ACTB</i>      | 0.0209279 | 2.05        | 3h vs 0h              |
| 60   | B2.e8              | hypothetical protein                                                                           | <i>LOC510651</i> | 0.0044301 | 2.04        | 3h vs 0h              |
| 61   | B1.d8              | Rho guanine nucleotide exchange factor, mRNA (GEF 1)                                           |                  | 0.0016250 | 2.01        | 3h vs 0h              |
| 62   | A11.a3             | glioma tumor suppressor candidate region gene 2                                                | <i>GLTSCR2</i>   | 0.0060427 | 2.01        | 3h vs 0h              |
| 63   | D11.i6             | insulin receptor substrate 1, mRNA (IRS1)                                                      |                  | 0.0078117 | 2.01        | 3h vs 0h              |
| 64   | D11.i2             | similar to p70 ribosomal S6 kinase beta                                                        | <i>LOC506083</i> | 0.0174021 | 2.01        | 3h vs 0h              |
| 65   | D1.i7              | similar to Serum response factor (SRF)                                                         | <i>LOC533039</i> | 0.0016012 | 2.00        | 3h vs 0h              |
| 66   | D6.a5              | DAZ associated protein 2                                                                       | <i>DAZAP2</i>    | 0.0169674 | 2.00        | 3h vs 0h              |
| 67   | B11.d8             | SWI/SNF related, matrix associated, actin dependent regulator of chromatin, subfamily a-like 1 | <i>SMARCAL1</i>  | 0.0011546 | 1.98        | 3h vs 0h              |
| 68   | B2.d9              | fibroblast growth factor receptor 2                                                            | <i>FGFR2</i>     | 0.0159178 | 1.98        | 3h vs 0h              |
| 69   | A11.g2             | similar to death receptor 3                                                                    | <i>LOC783432</i> | 0.0162147 | 1.98        | 3h vs 0h              |
| 70   | D6.i2              | similar to neuropilin-1                                                                        | <i>LOC539369</i> | 0.0349684 | 1.98        | 3h vs 0h              |

| Rank | BOTL-5 coordinates | Feature description                                                                                                                                          | Gene symbol      | P-value   | Fold-change | Time point comparison |
|------|--------------------|--------------------------------------------------------------------------------------------------------------------------------------------------------------|------------------|-----------|-------------|-----------------------|
| 71   | B3.d9              | myelin basic protein (MBP)                                                                                                                                   |                  | 0.0434810 | 1.98        | 3h vs 0h              |
| 72   | C4.d9              | inhibitor of kappa light polypeptide gene enhancer in B-cells, kinase beta                                                                                   | <i>IKKBK</i>     | 0.0437243 | 1.98        | 3h vs 0h              |
| 73   | A11.e8             | glioma tumor suppressor candidate region gene 2                                                                                                              | <i>GLTSCR2</i>   | 0.0136695 | 1.95        | 3h vs 0h              |
| 74   | C11.b3             | BOTL0100003XC06R                                                                                                                                             | <i>AY957499</i>  | 0.0091897 | 1.92        | 3h vs 0h              |
| 75   | B9.d8              | similar to nuclear receptor co-repressor 1 isoform 3                                                                                                         | <i>NCOR1</i>     | 0.0113368 | 1.90        | 3h vs 0h              |
| 76   | B9.h9              | similar to nuclear receptor co-repressor 1 isoform 3                                                                                                         | <i>NCOR1</i>     | 0.0275800 | 1.90        | 3h vs 0h              |
| 77   | A7.f1              | uncoupling protein 2 (mitochondrial, proton carrier)                                                                                                         | <i>UCP2</i>      | 0.0080319 | 1.89        | 3h vs 0h              |
| 78   | A1.a7              | Similar to KIAA0668 protein                                                                                                                                  | <i>LOC618392</i> | 0.0031005 | 1.88        | 3h vs 0h              |
| 79   | D11.e3             | lymphotoxin alpha                                                                                                                                            | <i>LTA</i>       | 0.0226303 | 1.88        | 3h vs 0h              |
| 80   | B6.f2              | similar to Rho-related GTP-binding protein Rho6 (Rho family GTPase 1) (Rnd1)                                                                                 |                  | 0.0225457 | 1.87        | 3h vs 0h              |
| 81   | A7.g1              | leukocyte receptor cluster (LRC) member 1                                                                                                                    | <i>LENG1</i>     | 0.0068147 | 1.86        | 3h vs 0h              |
| 82   | A8.a8              | similar to Tyrosine-protein kinase Lyn                                                                                                                       | <i>LOC534996</i> | 0.0023238 | 1.85        | 3h vs 0h              |
| 83   | B2.i2              | fibroblast growth factor receptor 2                                                                                                                          | <i>FGFR2</i>     | 0.0023800 | 1.84        | 3h vs 0h              |
| 84   | B9.e2              | similar to C-terminal binding protein 1                                                                                                                      | <i>LOC513131</i> | 0.0175062 | 1.83        | 3h vs 0h              |
| 85   | D8.b7              | similar to HCF, C1, VCAF, CFF=VP16 accessory protein host cell factor                                                                                        | <i>LOC512908</i> | 0.0011176 | 1.82        | 3h vs 0h              |
| 86   | A11.f2             | similar to Lymphocyte antigen Ly-6E precursor (Retinoic acid-induced gene E protein) (RIG-E) (Thymic shared antigen 1) (TSA-1) (Stem cell antigen 2) (SCA-2) | <i>SCA-2</i>     | 0.0046485 | 1.77        | 3h vs 0h              |
| 87   | A6.b8              | similar to SET binding factor 1                                                                                                                              | <i>LOC510349</i> | 0.0054413 | 1.77        | 3h vs 0h              |
| 88   | C6.d7              | nuclear factor of kappa light polypeptide gene enhancer in B-cells 1 (p105)                                                                                  | <i>NFKB1</i>     | 0.0334521 | 1.77        | 3h vs 0h              |

| Rank | BOTL-5 coordinates | Feature description                                                                                                                                          | Gene symbol      | P-value   | Fold-change | Time point comparison |
|------|--------------------|--------------------------------------------------------------------------------------------------------------------------------------------------------------|------------------|-----------|-------------|-----------------------|
| 89   | A8.i3              | similar to MAP kinase-activated protein kinase 2 (MAPK-activated protein kinase 2) (MAPKAP kinase 2) (MAPKAPK-2) (MK2)                                       | <i>LOC788091</i> | 0.0426963 | 1.77        | 3h vs 0h              |
| 90   | B8.e1              | RAS p21 protein activator (GTPase activating protein) 3 (Ins(1,3,4,5)P4-binding protein)                                                                     | <i>RASA3</i>     | 0.0069693 | 1.76        | 3h vs 0h              |
| 91   | A4.i8              | hypothetical protein                                                                                                                                         | <i>LOC513497</i> | 0.0146517 | 1.76        | 3h vs 0h              |
| 92   | D8.g1              | similar to HCF, C1, VCAF, CFF=VP16 accessory protein host cell factor                                                                                        | <i>LOC512908</i> | 0.0042541 | 1.75        | 3h vs 0h              |
| 93   | D11.d9             | similar to p70 ribosomal S6 kinase beta                                                                                                                      | <i>LOC506083</i> | 0.0053191 | 1.75        | 3h vs 0h              |
| 94   | A9.e9              | hypothetical protein                                                                                                                                         | <i>LOC514346</i> | 0.0099714 | 1.75        | 3h vs 0h              |
| 95   | C11.f7             | BOTL0100003XC06R                                                                                                                                             |                  | 0.0123586 | 1.75        | 3h vs 0h              |
| 96   | B6.b7              | similar to Syntaxin-5                                                                                                                                        |                  | 0.0346125 | 1.74        | 3h vs 0h              |
| 97   | B8.i3              | RAS p21 protein activator (GTPase activating protein) 3 (Ins(1,3,4,5)P4-binding protein)                                                                     | <i>RASA3</i>     | 0.0148152 | 1.72        | 3h vs 0h              |
| 98   | A11.a6             | similar to Lymphocyte antigen Ly-6E precursor (Retinoic acid-induced gene E protein) (RIG-E) (Thymic shared antigen 1) (TSA-1) (Stem cell antigen 2) (SCA-2) | <i>SCA-2</i>     | 0.0013375 | 1.71        | 3h vs 0h              |
| 99   | B5.i2              | NBFGC_AW659262 BRCA1associated protein-1 (ubiquitin carboxy-                                                                                                 |                  | 0.0068029 | 1.71        | 3h vs 0h              |
| 100  | A4.e9              | similar to SFPQ protein                                                                                                                                      | <i>LOC618226</i> | 0.0050394 | 1.70        | 3h vs 0h              |
| 101  | A6.a5              | similar to actin-binding LIM protein 1 isoform 3                                                                                                             | <i>LOC504968</i> | 0.0169954 | 1.70        | 3h vs 0h              |
| 102  | A3.i6              | monocyte-chemoattractant protein-1 precursor                                                                                                                 | <i>CCL2</i>      | 0.0280098 | 1.70        | 3h vs 0h              |
| 103  | B9.a3              | similar to TLE3 protein                                                                                                                                      | <i>LOC514326</i> | 0.0018475 | 1.69        | 3h vs 0h              |
| 104  | A9.a4              | hypothetical protein                                                                                                                                         | <i>LOC514346</i> | 0.0119533 | 1.69        | 3h vs 0h              |
| 105  | A10.a3             | similar to G protein-coupled receptor TGR7                                                                                                                   | <i>LOC507247</i> | 0.0006034 | 1.68        | 3h vs 0h              |
| 106  | B9.e8              | similar to TLE3 protein                                                                                                                                      | <i>LOC514326</i> | 0.0032038 | 1.68        | 3h vs 0h              |

| Rank | BOTL-5 coordinates | Feature description                                                                                                    | Gene symbol      | P-value   | Fold-change | Time point comparison |
|------|--------------------|------------------------------------------------------------------------------------------------------------------------|------------------|-----------|-------------|-----------------------|
| 107  | B1.f8              | similar to Cathepsin W isoform 2                                                                                       | <i>LOC510967</i> | 0.0208599 | 1.68        | 3h vs 0h              |
| 108  | D5.e1              | prohibitin 2                                                                                                           | <i>PHB2</i>      | 0.0339694 | 1.68        | 3h vs 0h              |
| 109  | C5.g5              | pyruvate kinase 3                                                                                                      | <i>PKM3</i>      | 0.0083753 | 1.67        | 3h vs 0h              |
| 110  | D11.i5             | lymphotoxin alpha                                                                                                      | <i>LTA</i>       | 0.0037350 | 1.65        | 3h vs 0h              |
| 111  | A8.e1              | similar to MAP kinase-activated protein kinase 2 (MAPK-activated protein kinase 2) (MAPKAP kinase 2) (MAPKAPK-2) (MK2) | <i>LOC788091</i> | 0.0042469 | 1.65        | 3h vs 0h              |
| 112  | A1.g8              | endonuclease domain containing 1                                                                                       | <i>ENDOD1</i>    | 0.0296320 | 1.65        | 3h vs 0h              |
| 113  | A2.b5              | similar to mitogen-activated protein kinase kinase kinase kinase 2                                                     | <i>LOC520058</i> | 0.0055596 | 1.64        | 3h vs 0h              |
| 114  | A4.a4              | similar to SFPQ protein                                                                                                | <i>LOC618226</i> | 0.0202767 | 1.63        | 3h vs 0h              |
| 115  | D4.g1              | hypothetical protein                                                                                                   | <i>LOC786280</i> | 0.0077852 | 1.62        | 3h vs 0h              |
| 116  | C2.c1              | TAF6 RNA polymerase II, TATA box binding protein (TBP)-associated factor, 80kDa                                        | <i>TAF6</i>      | 0.0226052 | 1.62        | 3h vs 0h              |
| 117  | A2.f8              | similar to mitogen-activated protein kinase kinase kinase kinase 2                                                     | <i>LOC520058</i> | 0.0004584 | 1.61        | 3h vs 0h              |
| 118  | D8.e2              | similar to GCN5 general control of amino-acid synthesis 5-like 2 (yeast)                                               | <i>LOC514420</i> | 0.0010109 | 1.61        | 3h vs 0h              |
| 119  | A9.c4              | hypothetical protein                                                                                                   | <i>LOC615329</i> | 0.0137242 | 1.61        | 3h vs 0h              |
| 120  | D6.e1              | Unknown                                                                                                                | -                | 0.0150092 | 1.61        | 3h vs 0h              |
| 121  | D8.d3              | ADP-ribosyltransferase (NAD+) poly (ADP-ribose) polymerase)                                                            | <i>PARP1</i>     | 0.0334735 | 1.61        | 3h vs 0h              |
| 122  | B7.e7              | mitogen-activated protein kinase kinase 1, RNA (MAP2K1)                                                                |                  | 0.0036071 | 1.59        | 3h vs 0h              |
| 123  | C5.c2              | pyruvate kinase 3                                                                                                      | <i>PKM3</i>      | 0.0353435 | 1.59        | 3h vs 0h              |
| 124  | A6.g2              | similar to SET binding factor 1                                                                                        | <i>LOC510349</i> | 0.0315143 | 1.58        | 3h vs 0h              |
| 125  | B2.a3              | hypothetical protein                                                                                                   | <i>LOC510651</i> | 0.0279914 | 1.57        | 3h vs 0h              |

| Rank | BOTL-5 coordinates | Feature description                                    | Gene symbol      | P-value   | Fold-change | Time point comparison |
|------|--------------------|--------------------------------------------------------|------------------|-----------|-------------|-----------------------|
| 126  | A9.g6              | hypothetical protein                                   | <i>LOC615329</i> | 0.0158345 | 1.56        | 3h vs 0h              |
| 127  | C2.e2              | retinoid X receptor, beta                              | <i>RXRB</i>      | 0.0003208 | 1.55        | 3h vs 0h              |
| 128  | B3.i6              | similar to p101 protein                                | <i>LOC614838</i> | 0.0024366 | 1.53        | 3h vs 0h              |
| 129  | A1.c1              | similar to AF-4                                        | <i>LOC781149</i> | 0.0024641 | 1.53        | 3h vs 0h              |
| 130  | C9.b7              | similar to Eif5 protein isoform 3                      | <i>LOC504752</i> | 0.0486630 | 1.53        | 3h vs 0h              |
| 131  | B3.e4              | similar to p101 protein                                | <i>LOC614838</i> | 0.0094611 | 1.52        | 3h vs 0h              |
| 132  | B1.b5              | similar to Cathepsin W isoform 2                       | <i>LOC510967</i> | 0.0097576 | 1.50        | 3h vs 0h              |
| 133  | D9.g1              | seryl-tRNA synthetase 2                                | <i>SARS2</i>     | 0.0429487 | 1.50        | 3h vs 0h              |
| 134  | A1.c5              | endonuclease domain containing 1                       | <i>ENDOD1</i>    | 0.0313649 | 1.49        | 3h vs 0h              |
| 135  | D6.f8              | BOTL0100009_A01                                        |                  | 0.0135001 | 1.48        | 3h vs 0h              |
| 136  | A8.g2              | BOTL0100012_E05                                        |                  | 0.0428093 | 1.48        | 3h vs 0h              |
| 137  | A6.f5              | similar to neurogranin                                 |                  | 0.0409134 | 1.47        | 3h vs 0h              |
| 138  | A9.f3              | hypothetical protein                                   | <i>LOC509987</i> | 0.0232827 | 1.46        | 3h vs 0h              |
| 139  | A6.a8              | similar to neurogranin                                 |                  | 0.0277665 | 1.46        | 3h vs 0h              |
| 140  | A6.g3              | hypothetical protein                                   | <i>LOC506974</i> | 0.0107055 | 1.44        | 3h vs 0h              |
| 141  | D6.b5              | BOTL0100009_A01                                        |                  | 0.0117410 | 1.44        | 3h vs 0h              |
| 142  | A11.g5             | adenylate cyclase 7                                    | <i>ADCY7</i>     | 0.0212583 | 1.44        | 3h vs 0h              |
| 143  | C4.a4              | similar to beta-1,2-N-acetylglucosaminyltransferase II | <i>LOC790576</i> | 0.0337149 | 1.44        | 3h vs 0h              |
| 144  | A3.f2              | Similar to Hexokinase 3 (white cell)                   | <i>HK3</i>       | 0.0239656 | 1.43        | 3h vs 0h              |



| Rank | BOTL-5 coordinates | Feature description                                                                                        | Gene symbol      | P-value   | Fold-change | Time point comparison |
|------|--------------------|------------------------------------------------------------------------------------------------------------|------------------|-----------|-------------|-----------------------|
| 145  | A9.a7              | hypothetical protein                                                                                       | <i>LOC509987</i> | 0.0189125 | 1.42        | 3h vs 0h              |
| 146  | D4.b7              | hypothetical protein                                                                                       | <i>LOC786280</i> | 0.0045725 | 1.41        | 3h vs 0h              |
| 147  | B9.b6              | similar to human immunity associated protein 1                                                             | <i>LOC615733</i> | 0.0481828 | 1.40        | 3h vs 0h              |
| 148  | B4.d3              | chemokine (C-C motif) ligand 3-like 1                                                                      | <i>CCL3L1</i>    | 0.0033673 | 1.39        | 3h vs 0h              |
| 149  | D8.g3              | hypothetical protein                                                                                       | <i>LOC616055</i> | 0.0129208 | 1.38        | 3h vs 0h              |
| 150  | C4.e9              | similar to beta-1,2-N-acetylglucosaminyltransferase II                                                     | <i>LOC790576</i> | 0.0131187 | 1.37        | 3h vs 0h              |
| 151  | A6.b9              | hypothetical protein                                                                                       |                  | 0.0163643 | 1.37        | 3h vs 0h              |
| 152  | C2.f1              | Unknown                                                                                                    |                  | 0.0229631 | 1.37        | 3h vs 0h              |
| 153  | A6.f7              | similar to Poly [ADP-ribose] polymerase 10 (PARP-10)                                                       | <i>LOC510991</i> | 0.0035098 | 1.35        | 3h vs 0h              |
| 154  | D6.g1              | BOTL0100013_F10                                                                                            | <i>LOC516783</i> | 0.0354595 | 1.35        | 3h vs 0h              |
| 155  | D8.i4              | similar to GCN5 general control of amino-acid synthesis 5-like 2 (yeast)                                   | <i>LOC514420</i> | 0.0318256 | 1.34        | 3h vs 0h              |
| 156  | D5.a7              | strongly similar to XP_001101736.1 similar to homolog of yeast mRNA transport regulator 3 [Macaca mulatta] |                  | 0.0275627 | 1.32        | 3h vs 0h              |
| 157  | A4.b9              | hypothetical protein                                                                                       | <i>LOC507577</i> | 0.0339311 | 1.30        | 3h vs 0h              |
| 158  | D3.i8              | similar to caspase-2                                                                                       | <i>CASP2</i>     | 0.0327964 | 1.28        | 3h vs 0h              |
| 159  | D8.b9              | hypothetical protein                                                                                       | <i>LOC616055</i> | 0.0075793 | 1.27        | 3h vs 0h              |
| 160  | D8.g2              | BOTL0100013_G08                                                                                            |                  | 0.0385722 | 1.26        | 3h vs 0h              |
| 161  | D11.c1             | hypothetical protein                                                                                       | <i>LOC532712</i> | 0.0412314 | 1.25        | 3h vs 0h              |
| 162  | B5.a7              | similar to gigaxonin                                                                                       | <i>GAN</i>       | 0.0320668 | 1.24        | 3h vs 0h              |
| 163  | D10.b5             | BOTL0100009_B10                                                                                            |                  | 0.0342398 | 1.19        | 3h vs 0h              |

| Rank | BOTL-5 coordinates | Feature description                                                                                   | Gene symbol      | P-value   | Fold-change | Time point comparison |
|------|--------------------|-------------------------------------------------------------------------------------------------------|------------------|-----------|-------------|-----------------------|
| 164  | D6.i4              | similar to calcium/calmodulin-dependent protein kinase I                                              |                  | 0.0375180 | 1.18        | 3h vs 0h              |
| 165  | C9.a3              | similar to Dynein intermediate chain 2, cytosolic (DH IC-2) (Cytoplasmic dynein intermediate chain 2) | <i>DYNC1I2</i>   | 0.0461438 | -1.17       | 3h vs 0h              |
| 166  | B8.e9              | similar to Kremen2 protein                                                                            | <i>LOC618527</i> | 0.0034077 | -1.20       | 3h vs 0h              |
| 167  | A8.e9              | hypothetical protein                                                                                  | <i>LOC768044</i> | 0.0101607 | -1.20       | 3h vs 0h              |
| 168  | C5.g2              | Transcribed locus                                                                                     |                  | 0.0173350 | -1.22       | 3h vs 0h              |
| 169  | A10.g2             | similar to tangerin C                                                                                 | <i>LOC788760</i> | 0.0268463 | -1.23       | 3h vs 0h              |
| 170  | C8.g5              | similar to Interleukin-1 receptor-associated kinase 4 (IRAK-4) (NY-REN-64 antigen)                    |                  | 0.0441493 | -1.24       | 3h vs 0h              |
| 171  | D11.g6             | BOTL0100012_A06                                                                                       |                  | 0.0327683 | -1.25       | 3h vs 0h              |
| 172  | B5.a6              | similar to protein tyrosine phosphatase, receptor type, F                                             | <i>LOC790379</i> | 0.0392893 | -1.26       | 3h vs 0h              |
| 173  | C11.a3             | similar to ZNF786 protein                                                                             | <i>LOC506408</i> | 0.0098941 | -1.27       | 3h vs 0h              |
| 174  | D8.f3              | hypothetical protein                                                                                  | <i>LOC617688</i> | 0.0278973 | -1.28       | 3h vs 0h              |
| 175  | C3.f3              | ribosomal protein, large, P1                                                                          | <i>RPLP1</i>     | 0.0248478 | -1.29       | 3h vs 0h              |
| 176  | B7.b3              | BOTL0100004XF08R                                                                                      |                  | 0.0325903 | -1.29       | 3h vs 0h              |
| 177  | A1.e9              | hypothetical protein                                                                                  | <i>LOC537453</i> | 0.0487361 | -1.29       | 3h vs 0h              |
| 178  | D11.f3             | ret finger protein 2                                                                                  | <i>TRIM13</i>    | 0.0210337 | -1.31       | 3h vs 0h              |
| 179  | C3.a7              | ribosomal protein, large, P1                                                                          | <i>RPLP1</i>     | 0.0293211 | -1.31       | 3h vs 0h              |
| 180  | A10.b8             | similar to tangerin C                                                                                 | <i>LOC788760</i> | 0.0297898 | -1.31       | 3h vs 0h              |
| 181  | B10.b7             | splicing factor, arginine/serine-rich 7, 35kDa                                                        | <i>SFRS7</i>     | 0.0462638 | -1.32       | 3h vs 0h              |
| 182  | C1.a3              | protein phosphatase 2 (formerly 2A), catalytic subunit, alpha isoform                                 | <i>PPP2R2A</i>   | 0.0154861 | -1.33       | 3h vs 0h              |

| Rank | BOTL-5 coordinates | Feature description                                                                                                                         | Gene symbol                            | P-value   | Fold-change | Time point comparison |
|------|--------------------|---------------------------------------------------------------------------------------------------------------------------------------------|----------------------------------------|-----------|-------------|-----------------------|
| 183  | C4.a7              | similar to Pre-mRNA cleavage complex 2 protein Pcf11 (Pre-mRNA cleavage complex II protein Pcf11)                                           | <i>LOC510604</i>                       | 0.0253967 | -1.33       | 3h vs 0h              |
| 184  | C4.a8              | guanine nucleotide binding protein (G protein), alpha inhibiting activity polypeptide 3                                                     | <i>GNAI3</i>                           | 0.0332849 | -1.33       | 3h vs 0h              |
| 185  | C5.e9              | similar to Serine/threonine protein phosphatase 6 (PP6)                                                                                     | <i>LOC608922</i>                       | 0.0436579 | -1.33       | 3h vs 0h              |
| 186  | B9.f7              | BOTL0100004XG08R                                                                                                                            |                                        | 0.0031473 | -1.34       | 3h vs 0h              |
| 187  | D10.a3             | Transcribed locus                                                                                                                           |                                        | 0.0135365 | -1.34       | 3h vs 0h              |
| 188  | A10.f7             | similar to insulin induced gene 1                                                                                                           |                                        | 0.0476418 | -1.34       | 3h vs 0h              |
| 189  | C3.g3              | BOTL0100009_E08                                                                                                                             |                                        | 0.0036865 | -1.36       | 3h vs 0h              |
| 190  | B10.a4             | hypothetical protein                                                                                                                        | <i>LOC515972</i>                       | 0.0045413 | -1.36       | 3h vs 0h              |
| 191  | A6.i5              | similar to AXL receptor tyrosine kinase                                                                                                     | <i>LOC516598</i>                       | 0.0115676 | -1.36       | 3h vs 0h              |
| 192  | D11.a7             | ret finger protein 2                                                                                                                        | <i>TRIM13</i>                          | 0.0151925 | -1.36       | 3h vs 0h              |
| 193  | C8.g3              | BOTL0100012_E09                                                                                                                             |                                        | 0.0482115 | -1.36       | 3h vs 0h              |
| 194  | B10.g1             | splicing factor, arginine/serine-rich 7, 35kDa                                                                                              | <i>SFRS7</i>                           | 0.0035702 | -1.38       | 3h vs 0h              |
| 195  | B10.e9             | hypothetical protein                                                                                                                        | <i>LOC515972</i>                       | 0.0312184 | -1.38       | 3h vs 0h              |
| 196  | D5.e9              | BOTL0100003XF04R                                                                                                                            | -                                      | 0.0469598 | -1.38       | 3h vs 0h              |
| 197  | D4.e9              | nuclear factor (erythroid-derived 2)-like 2                                                                                                 | <i>NFE2L2</i>                          | 0.0349485 | -1.39       | 3h vs 0h              |
| 198  | C9.e3              | chemokine (C-X-C motif) ligand 2                                                                                                            | <i>CXCL2</i>                           | 0.0418240 | -1.39       | 3h vs 0h              |
| 199  | C10.g1             | similar to ryanodine receptor 3   similar to cell death regulator aven                                                                      | <i>LOC539899</i>  <br><i>LOC512666</i> | 0.0367274 | -1.40       | 3h vs 0h              |
| 200  | B9.b3              | BOTL0100004XG08R                                                                                                                            |                                        | 0.0012430 | -1.41       | 3h vs 0h              |
| 201  | C9.a6              | similar to Polyadenylate-binding protein-interacting protein 2 (Poly(A) binding protein-interacting protein 2) (PABP-interacting protein 2) | <i>PAIP-2</i>                          | 0.0350569 | -1.41       | 3h vs 0h              |

| Rank | BOTL-5 coordinates | Feature description                                                                                                                                  | Gene symbol      | P-value   | Fold-change | Time point comparison |
|------|--------------------|------------------------------------------------------------------------------------------------------------------------------------------------------|------------------|-----------|-------------|-----------------------|
|      |                    | (PAIP-2)                                                                                                                                             |                  |           |             |                       |
| 202  | A6.c5              | adaptor-related protein complex 1, sigma 1 subunit                                                                                                   | <i>AP1S1</i>     | 0.0129807 | -1.42       | 3h vs 0h              |
| 203  | C10.c8             | similar to subtilisin-like proprotein convertase (EC 3.4.21.-) PACE4 precursor, splice form A - human                                                | <i>LOC524684</i> | 0.0160122 | -1.42       | 3h vs 0h              |
| 204  | A12.g6             | hypothetical protein                                                                                                                                 | <i>LOC509282</i> | 0.0089175 | -1.43       | 3h vs 0h              |
| 205  | C9.f2              | similar to Polyadenylate-binding protein-interacting protein 2 (Poly(A) binding protein-interacting protein 2) (PABP-interacting protein 2) (PAIP-2) | <i>PAIP-2</i>    | 0.0254984 | -1.43       | 3h vs 0h              |
| 206  | B11.e8             | hydroxysteroid (17-beta) dehydrogenase 4                                                                                                             | <i>HSD17B4</i>   | 0.0358533 | -1.43       | 3h vs 0h              |
| 207  | D10.e8             | Transcribed locus                                                                                                                                    |                  | 0.0025625 | -1.44       | 3h vs 0h              |
| 208  | D11.e6             | Transcribed locus, strongly similar to NP_005345.3 D proto-oncogene                                                                                  |                  | 0.0161487 | -1.44       | 3h vs 0h              |
| 209  | B9.f5              | BOTL0100004XG06R                                                                                                                                     |                  | 0.0309670 | -1.44       | 3h vs 0h              |
| 210  | A3.e8              | H3 histone, family 3A                                                                                                                                | <i>H3F3A</i>     | 0.0320312 | -1.44       | 3h vs 0h              |
| 211  | B10.b6             | hypothetical protein                                                                                                                                 | <i>LOC788514</i> | 0.0151206 | -1.45       | 3h vs 0h              |
| 212  | C6.e9              | BOTL0100006XA10R                                                                                                                                     |                  | 0.0403011 | -1.45       | 3h vs 0h              |
| 213  | C3.f8              | Ribosomal protein S3Ae                                                                                                                               | <i>RPS3AE</i>    | 0.0213061 | -1.46       | 3h vs 0h              |
| 214  | B10.f1             | small inducible cytokine subfamily E, member 1                                                                                                       | <i>SCYE1</i>     | 0.0266269 | -1.46       | 3h vs 0h              |
| 215  | C10.g8             | similar to leukocyte differentiation antigen CD84                                                                                                    | <i>LOC510910</i> | 0.0385931 | -1.47       | 3h vs 0h              |
| 216  | A10.b3             | similar to insulin induced gene 1                                                                                                                    |                  | 0.0148179 | -1.48       | 3h vs 0h              |
| 217  | D5.c2              | Transcribed locus                                                                                                                                    |                  | 0.0494607 | -1.48       | 3h vs 0h              |
| 218  | B9.g3              | Transcribed locus                                                                                                                                    |                  | 0.0044560 | -1.49       | 3h vs 0h              |
| 219  | C10.h2             | similar to subtilisin-like proprotein convertase (EC 3.4.21.-) PACE4                                                                                 | <i>LOC524684</i> | 0.0151789 | -1.49       | 3h vs 0h              |

| Rank | BOTL-5 coordinates | Feature description                                                                                                            | Gene symbol      | P-value   | Fold-change | Time point comparison |
|------|--------------------|--------------------------------------------------------------------------------------------------------------------------------|------------------|-----------|-------------|-----------------------|
|      |                    | precursor, splice form A - human                                                                                               |                  |           |             |                       |
| 220  | A5.f8              | hypothetical protein                                                                                                           | <i>LOC617051</i> | 0.0434455 | -1.49       | 3h vs 0h              |
| 221  | A12.c4             | hypothetical protein                                                                                                           | <i>LOC509282</i> | 0.0019617 | -1.50       | 3h vs 0h              |
| 222  | C5.a4              | similar to Serine/threonine protein phosphatase 6 (PP6)                                                                        | <i>LOC608922</i> | 0.0263874 | -1.50       | 3h vs 0h              |
| 223  | B10.f9             | hypothetical protein                                                                                                           | <i>LOC788514</i> | 0.0119391 | -1.51       | 3h vs 0h              |
| 224  | C3.b5              | Ribosomal protein S3Ae                                                                                                         | <i>RPS3AE</i>    | 0.0132482 | -1.51       | 3h vs 0h              |
| 225  | B4.i4              | hypothetical protein isoform 4                                                                                                 | <i>LOC617051</i> | 0.0393397 | -1.51       | 3h vs 0h              |
| 226  | B5.g4              | similar to antigen identified by monoclonal antibody Ki-67                                                                     | <i>LOC513220</i> | 0.0045181 | -1.52       | 3h vs 0h              |
| 227  | C1.e8              | protein phosphatase 2 (formerly 2A), catalytic subunit, alpha isoform                                                          | <i>PPP2R2A</i>   | 0.0012290 | -1.55       | 3h vs 0h              |
| 228  | A10.c1             | similar to jumonji domain containing 1C                                                                                        | <i>LOC781067</i> | 0.0093736 | -1.55       | 3h vs 0h              |
| 229  | C2.c2              | ribosomal protein L6                                                                                                           | <i>RPL6</i>      | 0.0260173 | -1.55       | 3h vs 0h              |
| 230  | B9.b9              | Transcribed locus                                                                                                              |                  | 0.0454385 | -1.55       | 3h vs 0h              |
| 231  | B11.f2             | similar to NIR2                                                                                                                | <i>LOC533859</i> | 0.0377963 | -1.56       | 3h vs 0h              |
| 232  | D5.g5              | Transcribed locus                                                                                                              |                  | 0.0123478 | -1.57       | 3h vs 0h              |
| 233  | A4.i5              | hypothetical protein                                                                                                           | <i>LOC786378</i> | 0.0160048 | -1.58       | 3h vs 0h              |
| 234  | B11.a8             | Wiskott-Aldrich syndrome protein interacting protein                                                                           | <i>WIPF1</i>     | 0.0136073 | -1.59       | 3h vs 0h              |
| 235  | C11.e7             | similar to peptidyl-Pro cis trans isomerase isoform 1                                                                          |                  | 0.0497340 | -1.59       | 3h vs 0h              |
| 236  | B11.e3             | Transcribed locus, moderately similar to XP_001056150.1 similar to very large G-protein coupled receptor 1 [Rattus norvegicus] |                  | 0.0308682 | -1.63       | 3h vs 0h              |
| 237  | C7.f3              | hypothetical protein                                                                                                           | <i>LOC788861</i> | 0.0387677 | -1.63       | 3h vs 0h              |

| Rank | BOTL-5 coordinates | Feature description                                                                                                                | Gene symbol      | P-value   | Fold-change | Time point comparison |
|------|--------------------|------------------------------------------------------------------------------------------------------------------------------------|------------------|-----------|-------------|-----------------------|
| 238  | B11.a6             | similar to NIR2                                                                                                                    | <i>LOC533859</i> | 0.0263201 | -1.64       | 3h vs 0h              |
| 239  | A10.g4             | similar to jumonji domain containing 1C                                                                                            | <i>LOC781067</i> | 0.0388252 | -1.66       | 3h vs 0h              |
| 240  | A9.c2              | similar to Conserved oligomeric Golgi complex component 4                                                                          |                  | 0.0071944 | -1.67       | 3h vs 0h              |
| 241  | C7.a7              | hypothetical protein                                                                                                               | <i>LOC788861</i> | 0.0347999 | -1.69       | 3h vs 0h              |
| 242  | A9.c1              | similar to ornithine decarboxylase antizyme 2                                                                                      | <i>LOC524677</i> | 0.0186440 | -1.73       | 3h vs 0h              |
| 243  | A5.f2              | beta-2-microglobulin                                                                                                               | <i>B2M</i>       | 0.0420221 | -1.74       | 3h vs 0h              |
| 244  | C11.i8             | similar to peptidyl-Pro cis trans isomerase isoform 1                                                                              |                  | 0.0414637 | -1.76       | 3h vs 0h              |
| 245  | A7.g3              | syntaxin 7                                                                                                                         | <i>STX7</i>      | 0.0430864 | -1.77       | 3h vs 0h              |
| 246  | A9.g5              | similar to Conserved oligomeric Golgi complex component 4                                                                          |                  | 0.0249877 | -1.78       | 3h vs 0h              |
| 247  | A9.b5              | similar to carnitine O-palmitoyltransferase                                                                                        | <i>LOC506812</i> | 0.0044627 | -1.79       | 3h vs 0h              |
| 248  | B3.a6              | similar to methionine-tRNA synthetase                                                                                              | <i>LOC614580</i> | 0.0061971 | -1.81       | 3h vs 0h              |
| 249  | D10.f7             | hypothetical protein                                                                                                               | <i>LOC515358</i> | 0.0138063 | -1.81       | 3h vs 0h              |
| 250  | B3.f2              | similar to methionine-tRNA synthetase                                                                                              | <i>LOC614580</i> | 0.0060607 | -1.90       | 3h vs 0h              |
| 1    | C9.f8              | similar to Interferon-induced guanylate-binding protein 1 (GTP-binding protein 1) (Guanine nucleotide-binding protein 1) (HuGBP-1) | <i>LOC512486</i> | 0.0405088 | 2.50        | 12h vs 3h             |
| 2    | C9.b5              | similar to Interferon-induced guanylate-binding protein 1 (GTP-binding protein 1) (Guanine nucleotide-binding protein 1) (HuGBP-1) | <i>LOC512486</i> | 0.0320301 | 2.46        | 12h vs 3h             |
| 3    | A7.g3              | syntaxin 7                                                                                                                         | <i>STX7</i>      | 0.0296542 | 1.70        | 12h vs 3h             |
| 4    | C5.h4              | collagenase                                                                                                                        | <i>MMP1</i>      | 0.0027474 | 1.66        | 12h vs 3h             |
| 5    | A11.g4             | similar to chromosome 17 open reading frame 27                                                                                     | <i>LOC509283</i> | 0.0334622 | 1.58        | 12h vs 3h             |
| 6    | B9.b9              | BOTL0100011_C03                                                                                                                    |                  | 0.0056377 | 1.52        | 12h vs 3h             |

| Rank | BOTL-5 coordinates | Feature description                                                                                   | Gene symbol      | P-value   | Fold-change | Time point comparison |
|------|--------------------|-------------------------------------------------------------------------------------------------------|------------------|-----------|-------------|-----------------------|
| 7    | D12.f1             | BOTL0100008_F04                                                                                       |                  | 0.0064079 | 1.41        | 12h vs 3h             |
| 8    | C10.h2             | similar to subtilisin-like proprotein convertase (EC 3.4.21.-) PACE4 precursor, splice form A - human | <i>LOC524684</i> | 0.0498153 | 1.40        | 12h vs 3h             |
| 9    | C5.b8              | BOTL0100009_F06                                                                                       |                  | 0.0447063 | 1.22        | 12h vs 3h             |
| 10   | A10.g2             | similar to tangerin C                                                                                 | <i>LOC788760</i> | 0.0318948 | 1.10        | 12h vs 3h             |
| 11   | C11.g4             | BTG family, member 3                                                                                  | <i>BTG3</i>      | 0.0459919 | -1.13       | 12h vs 3h             |
| 12   | A4.g1              | thioredoxin-related transmembrane protein 2                                                           | <i>TMX2</i>      | 0.0363280 | -1.17       | 12h vs 3h             |
| 13   | B5.g3              | hypothetical protein                                                                                  | <i>LOC522360</i> | 0.0450938 | -1.20       | 12h vs 3h             |
| 14   | C2.f1              | Unknown                                                                                               |                  | 0.0316986 | -1.26       | 12h vs 3h             |
| 15   | A2.b6              | BOTL0100012_A12                                                                                       |                  | 0.0363306 | -1.27       | 12h vs 3h             |
| 16   | D3.f8              | Hypothetical protein                                                                                  | <i>LOC507199</i> | 0.0062010 | -1.28       | 12h vs 3h             |
| 17   | B1.f8              | similar to Cathepsin W isoform 2                                                                      | <i>LOC510967</i> | 0.0351526 | -1.29       | 12h vs 3h             |
| 18   | C12.a3             | abhydrolase domain containing 8                                                                       | <i>ABHD8</i>     | 0.0052133 | -1.31       | 12h vs 3h             |
| 19   | C5.c4              | similar to notch 2 preproprotein                                                                      | <i>LOC513730</i> | 0.0324785 | -1.32       | 12h vs 3h             |
| 20   | B7.i8              | mitogen-activated protein kinase kinase 1, RNA (MAP2K1)                                               |                  | 0.0088545 | -1.34       | 12h vs 3h             |
| 21   | A1.c1              | similar to AF-4                                                                                       | <i>LOC781149</i> | 0.0498954 | -1.34       | 12h vs 3h             |
| 22   | C5.i3              | macrophage migration inhibitory factor (glycosylation-inhibiting factor)                              | <i>MIF</i>       | 0.0379865 | -1.37       | 12h vs 3h             |
| 23   | D2.g3              | similar to ribosome associated membrane protein 4                                                     |                  | 0.0341231 | -1.38       | 12h vs 3h             |
| 24   | D1.i8              | similar to SIT protein isoform 1                                                                      | <i>LOC512027</i> | 0.0152282 | -1.39       | 12h vs 3h             |
| 25   | C7.f7              | coactosin-like 1 (Dictyostelium)                                                                      | <i>COTL1</i>     | 0.0336607 | -1.39       | 12h vs 3h             |

| Rank | BOTL-5 coordinates | Feature description                                                             | Gene symbol      | P-value   | Fold-change | Time point comparison |
|------|--------------------|---------------------------------------------------------------------------------|------------------|-----------|-------------|-----------------------|
| 26   | C2.e2              | retinoid X receptor, beta                                                       | <i>RXRβ</i>      | 0.0050493 | -1.40       | 12h vs 3h             |
| 27   | B5.i4              | Growth hormone                                                                  | <i>GH</i>        | 0.0368254 | -1.46       | 12h vs 3h             |
| 28   | B7.e7              | mitogen-activated protein kinase kinase 1, RNA (MAP2K1)                         |                  | 0.0025488 | -1.47       | 12h vs 3h             |
| 29   | D9.b7              | seryl-tRNA synthetase 2                                                         | <i>SARS2</i>     | 0.0187143 | -1.47       | 12h vs 3h             |
| 30   | D1.e6              | similar to Serum response factor (SRF)                                          | <i>LOC533039</i> | 0.0482394 | -1.48       | 12h vs 3h             |
| 31   | D1.i7              | similar to Serum response factor (SRF)                                          | <i>LOC533039</i> | 0.0387187 | -1.49       | 12h vs 3h             |
| 32   | A3.f2              | Similar to Hexokinase 3 (white cell)                                            | <i>LOC510616</i> | 0.0302245 | -1.50       | 12h vs 3h             |
| 33   | A1.g8              | endonuclease domain containing 1                                                |                  | 0.0305252 | -1.50       | 12h vs 3h             |
| 34   | B1.h9              | Rho guanine nucleotide exchange factor, mRNA (GEF 1)                            |                  | 0.0330438 | -1.50       | 12h vs 3h             |
| 35   | A2.f5              | Unknown                                                                         |                  | 0.0452648 | -1.50       | 12h vs 3h             |
| 36   | C12.a8             | Similar to Hexokinase 3 (white cell)                                            | <i>LOC510616</i> | 0.0057040 | -1.51       | 12h vs 3h             |
| 37   | A9.a8              | CD81 molecule                                                                   | <i>CD81</i>      | 0.0492306 | -1.52       | 12h vs 3h             |
| 38   | D4.b7              | hypothetical protein                                                            | <i>LOC786280</i> | 0.0439083 | -1.55       | 12h vs 3h             |
| 39   | D7.e6              | nitric oxide synthase 3 (endothelial cell)                                      | <i>NOS3</i>      | 0.0247806 | -1.56       | 12h vs 3h             |
| 40   | C5.g5              | pyruvate kinase 3                                                               | <i>PKM2</i>      | 0.0431808 | -1.56       | 12h vs 3h             |
| 41   | A9.f5              | CD81 molecule                                                                   | <i>CD81</i>      | 0.0309986 | -1.57       | 12h vs 3h             |
| 42   | A2.f8              | similar to mitogen-activated protein kinase kinase kinase kinase 2              | <i>LOC520058</i> | 0.0029827 | -1.59       | 12h vs 3h             |
| 43   | C2.g4              | TAF6 RNA polymerase II, TATA box binding protein (TBP)-associated factor, 80kDa | <i>TAF6</i>      | 0.0306969 | -1.60       | 12h vs 3h             |
| 44   | A2.b5              | similar to mitogen-activated protein kinase kinase kinase kinase 2              | <i>LOC520058</i> | 0.0048977 | -1.61       | 12h vs 3h             |



| Rank | BOTL-5 coordinates | Feature description                                                                            | Gene symbol      | P-value   | Fold-change | Time point comparison |
|------|--------------------|------------------------------------------------------------------------------------------------|------------------|-----------|-------------|-----------------------|
| 45   | B12.a4             | hypothetical protein                                                                           | <i>LOC514346</i> | 0.0221045 | -1.61       | 12h vs 3h             |
| 46   | B12.a7             | similar to retinoblastoma-associated factor 600 (RBAF600) isoform 1                            | <i>LOC514561</i> | 0.0326070 | -1.62       | 12h vs 3h             |
| 47   | D4.g1              | hypothetical protein                                                                           | <i>LOC786280</i> | 0.0123459 | -1.64       | 12h vs 3h             |
| 48   | B4.b5              | similar to cyclic nucleotide phosphodiesterase                                                 | <i>LOC533323</i> | 0.0473840 | -1.64       | 12h vs 3h             |
| 49   | B7.d8              | similar to KIAA2014 protein                                                                    | <i>LOC540105</i> | 0.0454207 | -1.68       | 12h vs 3h             |
| 50   | B12.e9             | hypothetical protein                                                                           | <i>LOC514346</i> | 0.0052202 | -1.69       | 12h vs 3h             |
| 51   | D1.i6              | GATA-binding protein 4 (GATA4)                                                                 |                  | 0.0497362 | -1.69       | 12h vs 3h             |
| 52   | B11.h9             | SWI/SNF related, matrix associated, actin dependent regulator of chromatin, subfamily a-like 1 | <i>SMARCAL1</i>  | 0.0110905 | -1.71       | 12h vs 3h             |
| 53   | B1.e6              | GATA binding protein 4 (GATA4)                                                                 |                  | 0.0421441 | -1.72       | 12h vs 3h             |
| 54   | A8.a8              | similar to Tyrosine-protein kinase Lyn                                                         | <i>LOC534996</i> | 0.0485333 | -1.75       | 12h vs 3h             |
| 55   | B12.f3             | similar to retinoblastoma-associated factor 600 (RBAF600) isoform 1                            | <i>LOC514561</i> | 0.0068731 | -1.78       | 12h vs 3h             |
| 56   | B8.i3              | RAS p21 protein activator (GTPase activating protein) 3 (Ins(1,3,4,5)P4-binding protein)       | <i>RASA3</i>     | 0.0200022 | -1.79       | 12h vs 3h             |
| 57   | B3.i2              | myelin basic protein (MBP)                                                                     |                  | 0.0447012 | -1.82       | 12h vs 3h             |
| 58   | B1.d8              | Rho guanine nucleotide exchange factor, mRNA (GEF 1)                                           |                  | 0.0027317 | -1.85       | 12h vs 3h             |
| 59   | C6.h7              | nuclear factor of kappa light polypeptide gene enhancer in B-cells 1 (p105)                    | <i>NFKB1</i>     | 0.0316886 | -1.85       | 12h vs 3h             |
| 60   | B6.e1              | eukaryotic translation elongation factor 1 gamma                                               | <i>EEF1G</i>     | 0.0256508 | -1.87       | 12h vs 3h             |
| 61   | D9.i8              | protein kinase, cAMP-dependent, regulatory, type I, beta                                       | <i>PRKAR1B</i>   | 0.0454800 | -1.87       | 12h vs 3h             |
| 62   | B8.e1              | RAS p21 protein activator (GTPase activating protein) 3 (Ins(1,3,4,5)P4-binding protein)       | <i>RASA3</i>     | 0.0291039 | -1.90       | 12h vs 3h             |
| 63   | A11.e8             | glioma tumor suppressor candidate region gene 2                                                | <i>GLTSCR2</i>   | 0.0314618 | -1.99       | 12h vs 3h             |

| Rank | BOTL-5 coordinates | Feature description                                               | Gene symbol                            | P-value   | Fold-change | Time point comparison |
|------|--------------------|-------------------------------------------------------------------|----------------------------------------|-----------|-------------|-----------------------|
| 64   | A11.a3             | glioma tumor suppressor candidate region gene 2                   | <i>GLTSCR2</i>                         | 0.0367875 | -1.99       | 12h vs 3h             |
| 65   | D11.e1             | Similar to serine/threonine protein kinase                        | <i>LOC514210</i>                       | 0.0423519 | -1.99       | 12h vs 3h             |
| 66   | B9.e1              | v-akt murine thymoma viral oncogene homolog 1                     | <i>AKT1</i>                            | 0.0377055 | -2.01       | 12h vs 3h             |
| 67   | A1.a7              | Similar to KIAA0668 protein                                       | <i>LOC618392</i>                       | 0.0125049 | -2.02       | 12h vs 3h             |
| 68   | A1.f3              | Similar to KIAA0668 protein                                       | <i>LOC618392</i>                       | 0.0084437 | -2.05       | 12h vs 3h             |
| 69   | D11.i3             | Similar to serine/threonine protein kinase                        | <i>LOC514210</i>                       | 0.0405599 | -2.08       | 12h vs 3h             |
| 70   | A2.g6              | hypothetical protein                                              | <i>LOC614093</i>                       | 0.0007606 | -2.16       | 12h vs 3h             |
| 71   | A3.g9              | CD14 molecule                                                     | <i>CD14</i>                            | 0.0380259 | -2.24       | 12h vs 3h             |
| 72   | B3.i5              | splicing factor, arginine/serine-rich 2                           | <i>SFRS2</i>                           | 0.0107057 | -2.29       | 12h vs 3h             |
| 73   | B3.e3              | splicing factor, arginine/serine-rich 2                           | <i>SFRS2</i>                           | 0.0113258 | -2.39       | 12h vs 3h             |
| 74   | C1.c4              | similar to MAP kinase kinase 7 gamma 1                            | <i>LOC787278</i>                       | 0.0259424 | -2.60       | 12h vs 3h             |
| 75   | C8.c6              | similar to chemokine CCL1/l-309   similar to chemokine CCL1/l-309 | <i>LOC786156</i>  <br><i>LOC786204</i> | 0.0234985 | -2.65       | 12h vs 3h             |
| 76   | C8.g9              | similar to chemokine CCL1/l-309   similar to chemokine CCL1/l-309 | <i>LOC786156</i>  <br><i>LOC786204</i> | 0.0142840 | -2.75       | 12h vs 3h             |
| 77   | C11.c2             | hypothetical protein                                              | <i>LOC512361</i>                       | 0.0182371 | -2.78       | 12h vs 3h             |
| 78   | C11.g5             | hypothetical protein                                              | <i>LOC512361</i>                       | 0.0213715 | -2.82       | 12h vs 3h             |
| 79   | A8.g9              | MHC class I heavy chain isoform 1                                 | <i>BOLA</i>                            | 0.0161226 | -2.93       | 12h vs 3h             |
| 80   | A8.c6              | MHC class I heavy chain isoform 1                                 | <i>BOLA</i>                            | 0.0138905 | -3.06       | 12h vs 3h             |
