# Supplementary material for: Antigen stimulation of peripheral blood mononuclear cells from Mycobacterium bovis infected cattle yields evidence for a novel gene expression program
Source: PubMed Central journal article supplement (PMC2569068; doi:10.1186/1471-2164-9-447), 2008-09-29
Supplement: 1471-2164-9-447-S2.pdf [file 1471-2164-9-447-S2.pdf]

**Paper Title:** Antigen stimulation of peripheral blood mononuclear cells from *Mycobacterium bovis* infected cattle yields evidence for a novel gene expression program. Meade, K.G. *et al.*

**Table S2:** Green shaded rows detail 88 BOTL-5 microarray spot features that showed significant differential expression for the non-infected control animal group ( $n = 6$ ) between  $T_3$  and  $T_0$  (3h versus 0h) post stimulation with bovine tuberculin. Yellow shaded rows detail 56 BOTL-5 microarray spot features that showed significant differential expression for the non-infected control animal group ( $n = 6$ ) between  $T_{12}$  and  $T_3$  (12h versus 3h) post stimulation with bovine tuberculin. [NB. Spot features are ranked by fold change for each time point comparison].

| Rank | BOTL-5 coordinates | Feature description                                                       | Gene symbol      | P-value   | Fold-change | Time point comparison |
|------|--------------------|---------------------------------------------------------------------------|------------------|-----------|-------------|-----------------------|
| 1    | C1.h4              | interleukin 8                                                             | <i>IL8</i>       | 0.0339158 | 2.22        | 3h vs 0h              |
| 2    | A6.e3              | similar to AXL receptor tyrosine kinase                                   | <i>LOC516598</i> | 0.0477895 | 1.93        | 3h vs 0h              |
| 3    | D7.i8              | mitogen-activated protein kinase 13                                       | <i>MAPK13</i>    | 0.0143389 | 1.90        | 3h vs 0h              |
| 4    | C10.e1             | nuclear factor of activated T-cells, cytoplasmic, calcineurin-dependent 4 | <i>NFATC4</i>    | 0.0040454 | 1.83        | 3h vs 0h              |
| 5    | D5.i6              | similar to casein kinase I-beta                                           | <i>LOC785423</i> | 0.0366969 | 1.80        | 3h vs 0h              |
| 6    | D7.i5              | cyclin B2                                                                 | <i>CCNB2</i>     | 0.0132994 | 1.79        | 3h vs 0h              |
| 7    | D7.e7              | mitogen-activated protein kinase 13                                       | <i>MAPK13</i>    | 0.0321791 | 1.79        | 3h vs 0h              |
| 8    | D9.e3              | BF074360 P120 Inhibin receptor, immunoglobulin superfamily-               |                  | 0.0412172 | 1.77        | 3h vs 0h              |
| 9    | C1.c2              | Xylosyltransferase II                                                     | <i>XYLT2</i>     | 0.0145205 | 1.70        | 3h vs 0h              |
| 10   | C4.i8              | similar to AXL receptor tyrosine kinase                                   | <i>LOC516598</i> | 0.0484454 | 1.69        | 3h vs 0h              |
| 11   | C3.g1              | similar to dynamin 2                                                      | <i>LOC511691</i> | 0.0060188 | 1.68        | 3h vs 0h              |
| 12   | C1.b8              | hypothetical protein                                                      | <i>LOC539923</i> | 0.0049735 | 1.67        | 3h vs 0h              |
| 13   | B6.a8              | similar to Brain protein I3 (pRGR2)                                       | <i>LOC615390</i> | 0.0252943 | 1.66        | 3h vs 0h              |

| Rank | BOTL-5 coordinates | Feature description                                                | Gene symbol      | P-value   | Fold-change | Time point comparison |
|------|--------------------|--------------------------------------------------------------------|------------------|-----------|-------------|-----------------------|
| 14   | C2.e4              | growth arrest and DNA-damage-inducible, alpha                      | <i>GADD45A</i>   | 0.0024995 | 1.64        | 3h vs 0h              |
| 15   | A3.b9              | Parkinson disease (autosomal recessive, early onset) 7             | <i>PARK7</i>     | 0.0042519 | 1.62        | 3h vs 0h              |
| 16   | A1.f2              | eukaryotic translation initiation factor 4 gamma, 2                | <i>EIF4G2</i>    | 0.0278052 | 1.61        | 3h vs 0h              |
| 17   | D1.f7              | N-myc downstream regulated gene 1                                  | <i>NDRG1</i>     | 0.0060494 | 1.59        | 3h vs 0h              |
| 18   | C3.g3              | BOTL0100009_E08                                                    |                  | 0.0369298 | 1.58        | 3h vs 0h              |
| 19   | B9.f5              | BOTL0100004XG06R                                                   |                  | 0.0466285 | 1.57        | 3h vs 0h              |
| 20   | A3.b8              | similar to Cell division cycle 34 homolog ( <i>S. cerevisiae</i> ) | <i>LOC616156</i> | 0.0162431 | 1.53        | 3h vs 0h              |
| 21   | C2.b5              | similar to SCY1-like 3                                             |                  | 0.0252009 | 1.50        | 3h vs 0h              |
| 22   | C1.f3              | BOTL0100002XD06R                                                   |                  | 0.0041564 | 1.48        | 3h vs 0h              |
| 23   | D2.b6              | hypothetical protein                                               | <i>LOC537028</i> | 0.0375238 | 1.48        | 3h vs 0h              |
| 24   | C3.f1              | similar to protein phosphatase 1, regulatory subunit 9B            | <i>LOC787141</i> | 0.0105992 | 1.46        | 3h vs 0h              |
| 25   | A1.f8              | BOTL0100002XE07R                                                   |                  | 0.0372668 | 1.46        | 3h vs 0h              |
| 26   | C10.a4             | similar to Poly [ADP-ribose] polymerase 10 (PARP-10)               | <i>LOC510991</i> | 0.0317206 | 1.44        | 3h vs 0h              |
| 27   | B5.i8              | hypothetical protein                                               | <i>LOC515777</i> | 0.0402354 | 1.44        | 3h vs 0h              |
| 28   | B1.a8              | similar to Ecotropic viral integration site 2B                     |                  | 0.0481491 | 1.44        | 3h vs 0h              |
| 29   | C3.a5              | similar to protein phosphatase 1, regulatory subunit 9B            | <i>LOC787141</i> | 0.0076385 | 1.43        | 3h vs 0h              |
| 30   | D3.i4              | max-associated protein (MAD4)                                      |                  | 0.0111948 | 1.43        | 3h vs 0h              |
| 31   | D3.f3              | similar to human immunity associated protein 1                     | <i>LOC615733</i> | 0.0147195 | 1.40        | 3h vs 0h              |
| 32   | C1.g2              | hypothetical protein                                               | <i>LOC539923</i> | 0.0129359 | 1.39        | 3h vs 0h              |

| Rank | BOTL-5 coordinates | Feature description                                                                                                                        | Gene symbol      | P-value   | Fold-change | Time point comparison |
|------|--------------------|--------------------------------------------------------------------------------------------------------------------------------------------|------------------|-----------|-------------|-----------------------|
| 33   | A3.g5              | O-sialoglycoprotein endopeptidase                                                                                                          | <i>OSGEP</i>     | 0.0241653 | 1.39        | 3h vs 0h              |
| 34   | C10.b3             | BOTL0100007_D05                                                                                                                            |                  | 0.0243122 | 1.38        | 3h vs 0h              |
| 35   | B5.e8              | protein tyrosine phosphatase, receptor type, C-associated protein                                                                          | <i>PTPRCAP</i>   | 0.0293541 | 1.37        | 3h vs 0h              |
| 36   | A9.a3              | tyrosine 3-monooxygenase/tryptophan 5-monooxygenase activation protein, eta polypeptide                                                    | <i>YWHAH</i>     | 0.0375958 | 1.37        | 3h vs 0h              |
| 37   | D1.i8              | similar to SIT protein isoform 1                                                                                                           | <i>LOC512027</i> | 0.0396894 | 1.37        | 3h vs 0h              |
| 38   | B1.a7              | Transcribed locus, strongly similar to XP_001107198.1 cyclin-dependent kinase inhibitor 2B (p15, inhibits CDK4) isoform 1 [Macaca mulatta] |                  | 0.0299652 | 1.35        | 3h vs 0h              |
| 39   | B2.i4              | similar to Signal transducer and activator of transcription 5B                                                                             | <i>LOC789476</i> | 0.0318601 | 1.34        | 3h vs 0h              |
| 40   | D4.b5              | Transcribed locus, weakly similar to XP_001368969.1 similar to Kruppel-like zinc finger transcription factor [Monodelphis domestica]       |                  | 0.0158395 | 1.24        | 3h vs 0h              |
| 41   | B1.f5              | similar to Ecotropic viral integration site 2B                                                                                             |                  | 0.0096597 | 1.20        | 3h vs 0h              |
| 42   | B8.a3              | similar to zinc finger protein 258                                                                                                         | <i>LOC618234</i> | 0.0231149 | -1.19       | 3h vs 0h              |
| 43   | A6.g4              | BOTL0100013_A04                                                                                                                            |                  | 0.0079003 | -1.22       | 3h vs 0h              |
| 44   | A4.f5              | BOTL0100006XF07R                                                                                                                           |                  | 0.0249586 | -1.27       | 3h vs 0h              |
| 45   | C5.e1              | macrophage migration inhibitory factor (glycosylation-inhibiting factor)                                                                   | <i>MIF</i>       | 0.0312857 | -1.27       | 3h vs 0h              |
| 46   | A2.h9              | (NSD) insulin-like 3, mRNA (INSL3)                                                                                                         |                  | 0.0344749 | -1.27       | 3h vs 0h              |
| 47   | B12.a5             | hypothetical protein                                                                                                                       | <i>LOC523618</i> | 0.0481437 | -1.36       | 3h vs 0h              |
| 48   | C7.g5              | similar to human immunity associated protein 1                                                                                             | <i>LOC615733</i> | 0.0285923 | -1.37       | 3h vs 0h              |
| 49   | D4.b7              | hypothetical protein                                                                                                                       | <i>LOC786280</i> | 0.0021148 | -1.38       | 3h vs 0h              |
| 50   | B2.a3              | hypothetical protein                                                                                                                       | <i>LOC510651</i> | 0.0245340 | -1.40       | 3h vs 0h              |

| Rank | BOTL-5 coordinates | Feature description                                                             | Gene symbol      | P-value   | Fold-change | Time point comparison |
|------|--------------------|---------------------------------------------------------------------------------|------------------|-----------|-------------|-----------------------|
| 51   | C2.c1              | TAF6 RNA polymerase II, TATA box binding protein (TBP)-associated factor, 80kDa | <i>TAF6</i>      | 0.0070652 | -1.42       | 3h vs 0h              |
| 52   | C9.c5              | Prolyl endopeptidase                                                            | <i>PREP</i>      | 0.0204150 | -1.43       | 3h vs 0h              |
| 53   | B1.i5              | heat shock 27kDa protein 1                                                      | <i>HSPB1</i>     | 0.0357928 | -1.43       | 3h vs 0h              |
| 54   | C8.i4              | (NSD) NBFGC_BF773656 SMAD 7 MAD-related gene                                    |                  | 0.0336135 | -1.46       | 3h vs 0h              |
| 55   | B6.e1              | eukaryotic translation elongation factor 1 gamma                                | <i>EEF1G</i>     | 0.0468064 | -1.46       | 3h vs 0h              |
| 56   | C5.c2              | pyruvate kinase 3                                                               | <i>PKM2</i>      | 0.0383230 | -1.47       | 3h vs 0h              |
| 57   | B9.b6              | similar to human immunity associated protein 1                                  | <i>LOC615733</i> | 0.0084612 | -1.48       | 3h vs 0h              |
| 58   | B9.f9              | similar to human immunity associated protein 1                                  | <i>LOC615733</i> | 0.0055554 | -1.51       | 3h vs 0h              |
| 59   | D1.e4              | GATA-binding protein 4 (GATA4)                                                  |                  | 0.0145124 | -1.51       | 3h vs 0h              |
| 60   | C12.g2             | hypothetical gene supported by BC069011                                         |                  | 0.0163030 | -1.51       | 3h vs 0h              |
| 61   | B6.b8              | similar to echinoderm microtubule-associated protein-like EMAP2                 | <i>LOC512380</i> | 0.0425366 | -1.51       | 3h vs 0h              |
| 62   | C5.i3              | macrophage migration inhibitory factor (glycosylation-inhibiting factor)        | <i>MIF</i>       | 0.0350640 | -1.53       | 3h vs 0h              |
| 63   | C6.g2              | similar to nucleoporin 214kDa                                                   | <i>LOC784219</i> | 0.0002050 | -1.54       | 3h vs 0h              |
| 64   | D8.b7              | similar to HCF, C1, VCAF, CFF=VP16 accessory protein host cell factor           | <i>LOC512908</i> | 0.0163401 | -1.54       | 3h vs 0h              |
| 65   | B4.f7              | glutathione synthetase                                                          | <i>GSS</i>       | 0.0461202 | -1.59       | 3h vs 0h              |
| 66   | C5.c4              | similar to notch 2 preproprotein                                                | <i>LOC513730</i> | 0.0436370 | -1.60       | 3h vs 0h              |
| 67   | B1.i7              | GATA binding protein 4 (GATA4)                                                  |                  | 0.0220182 | -1.61       | 3h vs 0h              |
| 68   | B3.i5              | splicing factor, arginine/serine-rich 2                                         | <i>SFRS2</i>     | 0.0465447 | -1.61       | 3h vs 0h              |
| 69   | C7.a3              | hypothetical protein                                                            | <i>LOC529141</i> | 0.0335372 | -1.62       | 3h vs 0h              |

| Rank | BOTL-5 coordinates | Feature description                                                        | Gene symbol                            | P-value   | Fold-change | Time point comparison |
|------|--------------------|----------------------------------------------------------------------------|----------------------------------------|-----------|-------------|-----------------------|
| 70   | B3.e3              | splicing factor, arginine/serine-rich 2                                    | <i>SFRS2</i>                           | 0.0245861 | -1.66       | 3h vs 0h              |
| 71   | A2.c7              | similar to Neutral sphingomyelinase (N-SMase) activation associated factor | <i>LOC509626</i>                       | 0.0369785 | -1.66       | 3h vs 0h              |
| 72   | C7.b3              | coactosin-like 1 (Dictyostelium)                                           | <i>COTL1</i>                           | 0.0096828 | -1.67       | 3h vs 0h              |
| 73   | A8.f5              | similar to Tyrosine-protein kinase Lyn                                     | <i>LOC534996</i>                       | 0.0260586 | -1.70       | 3h vs 0h              |
| 74   | A10.f5             | nurim (nuclear envelope membrane protein)                                  | <i>NRM</i>                             | 0.0179106 | -1.75       | 3h vs 0h              |
| 75   | A9.e9              | hypothetical protein                                                       | <i>LOC514346</i>                       | 0.0182601 | -1.75       | 3h vs 0h              |
| 76   | C6.b8              | similar to nucleoporin 214kDa                                              | <i>LOC784219</i>                       | 0.0056924 | -1.76       | 3h vs 0h              |
| 77   | B6.g2              | similar to echinoderm microtubule-associated protein-like EMAP2            | <i>LOC512380</i>                       | 0.0101119 | -1.79       | 3h vs 0h              |
| 78   | B9.a3              | similar to TLE3 protein                                                    | <i>LOC514326</i>                       | 0.0364183 | -1.86       | 3h vs 0h              |
| 79   | A11.e8             | glioma tumor suppressor candidate region gene 2                            | <i>GLTSCR2</i>                         | 0.0256987 | -1.92       | 3h vs 0h              |
| 80   | A9.a4              | hypothetical protein                                                       | <i>LOC514346</i>                       | 0.0212442 | -1.95       | 3h vs 0h              |
| 81   | D8.g1              | similar to HCF, C1, VCAF, CFF=VP16 accessory protein host cell factor      | <i>LOC512908</i>                       | 0.0463108 | -1.97       | 3h vs 0h              |
| 82   | B4.b8              | CD37 molecule                                                              | <i>CD37</i>                            | 0.0310984 | -2.02       | 3h vs 0h              |
| 83   | B1.e6              | GATA binding protein 4 (GATA4)                                             |                                        | 0.0216664 | -2.04       | 3h vs 0h              |
| 84   | B2.e8              | hypothetical protein                                                       | <i>LOC510651</i>                       | 0.0131737 | -2.07       | 3h vs 0h              |
| 85   | D11.h2             | chemokine (C-X-C motif) receptor 3                                         | <i>CXCR3</i>                           | 0.0407250 | -2.42       | 3h vs 0h              |
| 86   | C6.g9              | similar to GMCSFR receptor                                                 | <i>LOC511847</i>                       | 0.0034409 | -2.46       | 3h vs 0h              |
| 87   | C8.c6              | similar to chemokine CCL1/I-309   similar to chemokine CCL1/I-309          | <i>LOC786156</i>  <br><i>LOC786204</i> | 0.0455247 | -2.57       | 3h vs 0h              |
| 88   | B2.g9              | bone morphogenetic protein 4                                               | <i>BMP4</i>                            | 0.0380950 | -2.85       | 3h vs 0h              |

| Rank | BOTL-5 coordinates | Feature description                                                                                                                | Gene symbol      | P-value   | Fold-change | Time point comparison |
|------|--------------------|------------------------------------------------------------------------------------------------------------------------------------|------------------|-----------|-------------|-----------------------|
| 1    | C9.b5              | similar to Interferon-induced guanylate-binding protein 1 (GTP-binding protein 1) (Guanine nucleotide-binding protein 1) (HuGBP-1) | <i>LOC512486</i> | 0.0320900 | 3.24        | 12h vs 3h             |
| 2    | D1.i2              | DNA fragmentation factor, 45kDa, alpha polypeptide                                                                                 | <i>DFFA</i>      | 0.0251619 | 3.11        | 12h vs 3h             |
| 3    | B3.h1              | activin A receptor, type I                                                                                                         | <i>ACVR1</i>     | 0.0397434 | 2.99        | 12h vs 3h             |
| 4    | C1.g4              | similar to Carbonyl reductase 4                                                                                                    |                  | 0.0445068 | 2.39        | 12h vs 3h             |
| 5    | C10.c5             | similar to leukocyte differentiation antigen CD84                                                                                  | <i>LOC510910</i> | 0.0184758 | 2.19        | 12h vs 3h             |
| 6    | A2.b6              | BOTL0100012_A12                                                                                                                    |                  | 0.0172106 | 2.01        | 12h vs 3h             |
| 7    | A5.b6              | BOTL0100009_E09                                                                                                                    |                  | 0.0251325 | 1.85        | 12h vs 3h             |
| 8    | A9.b7              | CCAAT/enhancer binding protein (C/EBP), beta                                                                                       | <i>CEBPB</i>     | 0.0376696 | 1.80        | 12h vs 3h             |
| 9    | A11.g5             | adenylate cyclase 7                                                                                                                | <i>ADCY7</i>     | 0.0208110 | 1.78        | 12h vs 3h             |
| 10   | C11.e8             | similar to ZNF786 protein                                                                                                          | <i>LOC506408</i> | 0.0085415 | 1.71        | 12h vs 3h             |
| 11   | A5.c4              | hypothetical protein                                                                                                               | <i>LOC614103</i> | 0.0456471 | 1.70        | 12h vs 3h             |
| 12   | B11.f7             | similar to membrane component chromosome 11 surface marker 1                                                                       |                  | 0.0005171 | 1.66        | 12h vs 3h             |
| 13   | B10.a6             | similar to KIAA0691 protein                                                                                                        | <i>LOC527305</i> | 0.0216284 | 1.66        | 12h vs 3h             |
| 14   | A9.a5              | BOTL0100002XA10R                                                                                                                   |                  | 0.0476251 | 1.59        | 12h vs 3h             |
| 15   | D12.f3             | BOTL0100009_C01                                                                                                                    |                  | 0.0155669 | 1.57        | 12h vs 3h             |
| 16   | B4.g3              | similar to Runt domain containing protein                                                                                          | <i>LOC617389</i> | 0.0189017 | 1.57        | 12h vs 3h             |
| 17   | D11.f1             | BOTL0100004XA05R                                                                                                                   |                  | 0.0352874 | 1.55        | 12h vs 3h             |
| 18   | A3.h1              | CD34 molecule                                                                                                                      | <i>CD34</i>      | 0.0453671 | 1.52        | 12h vs 3h             |
| 19   | A12.f1             | hypothetical protein                                                                                                               | <i>LOC508039</i> | 0.0174107 | 1.40        | 12h vs 3h             |

| Rank | BOTL-5 coordinates | Feature description                                                                                                                        | Gene symbol      | P-value   | Fold-change | Time point comparison |
|------|--------------------|--------------------------------------------------------------------------------------------------------------------------------------------|------------------|-----------|-------------|-----------------------|
| 20   | B11.f8             | similar to U2 small nuclear RNA auxiliary factor 1-like 2                                                                                  | <i>LOC535064</i> | 0.0004531 | 1.37        | 12h vs 3h             |
| 21   | B12.a5             | hypothetical protein                                                                                                                       | <i>LOC523618</i> | 0.0383704 | 1.37        | 12h vs 3h             |
| 22   | A3.e4              | monocyte-chemoattractant protein-1 precursor                                                                                               | <i>CCL2</i>      | 0.0359519 | 1.35        | 12h vs 3h             |
| 23   | A4.e1              | ELK1, member of ETS oncogene family, mRNA (ELK1                                                                                            |                  | 0.0428107 | 1.34        | 12h vs 3h             |
| 24   | D10.b5             | BOTL0100009_B10                                                                                                                            |                  | 0.0414188 | 1.31        | 12h vs 3h             |
| 25   | B9.i7              | chemokine (C-C motif) ligand 25 (CCL25)                                                                                                    |                  | 0.0481403 | 1.27        | 12h vs 3h             |
| 26   | C10.a4             | similar to Poly [ADP-ribose] polymerase 10 (PARP-10)                                                                                       | <i>LOC510991</i> | 0.0460924 | 1.25        | 12h vs 3h             |
| 27   | C3.a5              | similar to protein phosphatase 1, regulatory subunit 9B                                                                                    | <i>LOC787141</i> | 0.0479989 | -1.22       | 12h vs 3h             |
| 28   | D3.f3              | similar to human immunity associated protein 1                                                                                             | <i>LOC615733</i> | 0.0044092 | -1.29       | 12h vs 3h             |
| 29   | B4.b6              | BOTL0100013_E09                                                                                                                            |                  | 0.0298447 | -1.37       | 12h vs 3h             |
| 30   | D8.f8              | BOTL0100009_A11                                                                                                                            |                  | 0.0288457 | -1.39       | 12h vs 3h             |
| 31   | B1.a7              | Transcribed locus, strongly similar to XP_001107198.1 cyclin-dependent kinase inhibitor 2B (p15, inhibits CDK4) isoform 1 [Macaca mulatta] |                  | 0.0214954 | -1.41       | 12h vs 3h             |
| 32   | A6.e8              | hypothetical protein                                                                                                                       | <i>LOC614141</i> | 0.0181110 | -1.43       | 12h vs 3h             |
| 33   | A6.a3              | hypothetical protein                                                                                                                       | <i>LOC614141</i> | 0.0397932 | -1.43       | 12h vs 3h             |
| 34   | B1.f3              | Transcribed locus, strongly similar to XP_001107198.1 cyclin-dependent kinase inhibitor 2B (p15, inhibits CDK4) isoform 1 [Macaca mulatta] |                  | 0.0391129 | -1.45       | 12h vs 3h             |
| 35   | C1.f2              | similar to transcriptional regulator protein                                                                                               |                  | 0.0451881 | -1.45       | 12h vs 3h             |
| 36   | A9.e9              | hypothetical protein                                                                                                                       | <i>LOC514346</i> | 0.0386235 | -1.46       | 12h vs 3h             |
| 37   | C1.a8              | BOTL0100002XD08R                                                                                                                           |                  | 0.0274202 | -1.51       | 12h vs 3h             |

| Rank | BOTL-5 coordinates | Feature description                                                                                                                 | Gene symbol      | P-value   | Fold-change | Time point comparison |
|------|--------------------|-------------------------------------------------------------------------------------------------------------------------------------|------------------|-----------|-------------|-----------------------|
| 38   | B7.a4              | Transcribed locus, moderately similar to XP_001113742.1 similar to WD repeat and FYVE domain containing 3, partial [Macaca mulatta] |                  | 0.0266146 | -1.53       | 12h vs 3h             |
| 39   | D5.h9              | casein kinase 1, gamma 1                                                                                                            | <i>CSNK1G1</i>   | 0.0355179 | -1.64       | 12h vs 3h             |
| 40   | D5.i4              | ribosomal protein L18a                                                                                                              | <i>RPL18A</i>    | 0.0239757 | -1.65       | 12h vs 3h             |
| 41   | B8.e2              | granulocyte colony stimulating factor                                                                                               | <i>CSF3</i>      | 0.0256316 | -1.68       | 12h vs 3h             |
| 42   | B5.i8              | hypothetical protein                                                                                                                | <i>LOC515777</i> | 0.0118895 | -1.70       | 12h vs 3h             |
| 43   | C9.a5              | similar to heterogeneous nuclear ribonucleoprotein D-like                                                                           | <i>LOC534770</i> | 0.0489859 | -1.70       | 12h vs 3h             |
| 44   | A4.e9              | similar to SFPQ protein                                                                                                             | <i>LOC618226</i> | 0.0339789 | -1.72       | 12h vs 3h             |
| 45   | A5.f7              | ribosomal protein L10                                                                                                               | <i>RPL10</i>     | 0.0442826 | -1.81       | 12h vs 3h             |
| 46   | D3.i4              | max-associated protein (MAD4)                                                                                                       |                  | 0.0129876 | -1.84       | 12h vs 3h             |
| 47   | D6.d9              | similar to neuropilin-1                                                                                                             | <i>LOC539369</i> | 0.0283286 | -1.87       | 12h vs 3h             |
| 48   | B8.i4              | granulocyte colony stimulating factor                                                                                               | <i>CSF3</i>      | 0.0074946 | -1.92       | 12h vs 3h             |
| 49   | A5.f3              | eukaryotic translation elongation factor 1 alpha 1                                                                                  | <i>EEF1A1</i>    | 0.0329128 | -2.05       | 12h vs 3h             |
| 50   | D9.f1              | similar to HS6ST1 protein                                                                                                           | <i>LOC518563</i> | 0.0475204 | -2.20       | 12h vs 3h             |
| 51   | A5.b5              | hypothetical protein                                                                                                                | <i>LOC617051</i> | 0.0441919 | -2.21       | 12h vs 3h             |
| 52   | B6.d9              | actin, beta                                                                                                                         | <i>ACTB</i>      | 0.0446725 | -2.35       | 12h vs 3h             |
| 53   | D2.i4              | mitogen-activated protein kinase kinase kinase (MAP3K1)                                                                             |                  | 0.0336032 | -2.44       | 12h vs 3h             |
| 54   | A5.f8              | hypothetical protein                                                                                                                | <i>LOC617051</i> | 0.0343348 | -2.81       | 12h vs 3h             |
| 55   | D8.d3              | ADP-ribosyltransferase (NAD+) poly (ADP-ribose) polymerase)                                                                         | <i>PARP1</i>     | 0.0184160 | -2.97       | 12h vs 3h             |
| 56   | D8.h5              | ADP-ribosyltransferase (NAD+) poly (ADP-ribose) polymerase)                                                                         | <i>PARP1</i>     | 0.0247990 | -3.01       | 12h vs 3h             |
